# Supplementary material for: Multiple Correspondence Analysis and HLA-Associations of Organ Involvement in a Large Cohort of African-American and European-American Patients with Sarcoidosis
Source: PubMed Central journal article supplement (PMC10284928; doi:10.1007/s00408-023-00626-6), 2023-06-15
Supplement: 408_2023_626_MOESM1_ESM.pdf [file 408_2023_626_MOESM1_ESM.pdf]

Supplemental Table 1 - Association of organ clusters by race to HLA-DRB1 risk alleles

|                          | <b>Cluster</b>                               | <b>OR (95% CI)</b>   | <b>p value</b> | <b>References</b> |
|--------------------------|----------------------------------------------|----------------------|----------------|-------------------|
| <b>African American</b>  |                                              |                      |                |                   |
| DRB1*01:02               | Cardiovascular/Muscular/<br>Calcium          | 4.49 (1.5; 12.13)    | 0.004          | [17]              |
| DRB1*04:04               | Abdominal<br>organs/Extrathoracic            | 6.74 (1.72; 23.2)    | 0.003          |                   |
| DRB1*07:01               | Skin                                         | 0.50 (0.30; 0.82)    | 0.008          |                   |
| DRB1*08:04               | Neuro/Ocular/Cardiac/<br>Salivary gland      | 2.38 (1.33; 4.11)    | 0.002          |                   |
| DRB1*11:02               | Muscle/Cardiac/Bone<br>marrow                | 4.38 (0.98; 14.08)   | 0.024          |                   |
| DRB1*12:02               | Renal/Cardiac/Vitamin D                      | 11.75 (0.57; 88.23)  | 0.035          |                   |
| DRB1*15:01               | Abdominal<br>organs/Extrathoracic            | 2.40 (0.93; 5.44)    | 0.049          |                   |
| <b>European American</b> |                                              |                      |                |                   |
| DRB1*03:01               | Bone/Joint/Skin                              | 2.79 (1.73; 4.55)    | 2.92E-05       |                   |
| DRB1*03:01               | Extrathoracic lymph<br>nodes/Salivary glands | 0.27 (0.06; 0.73)    | 0.027          | [19]              |
| DRB1*04:01               | Neurological/Ocular                          | 6.48 (2.72; 15.32)   | 1.97E-05       | [20, 21]          |
| DRB1*04:05               | Renal/Calcium                                | 36.75 (1.39; 618.85) | 0.011          | [22]              |

Statistical significance was defined as  $p < 0.05$ . Strict Bonferroni correction for multiple testing would result in significance at  $p < 0.002$ , however, given that these HLA alleles are not independent, we chose the more liberal cutoff value of  $p < 0.05$ .
